# Supplementary material for: Amphibious fishes: evolution and phenotypic plasticity
Source: Oxford University Press journal article supplement (doi:10.1242/jeb.126649), 2016-08-01
Supplement: jeb126649supp.pdf [file jeb126649supp.pdf]

**Table S1.**

[Click here to Download Table S1](#)
